# Supplementary material for: Low-temperature facile solution-processed gate dielectric for combustion derived oxide thin film transistors
Source: Royal Society of Chemistry journal article supplement (doi:10.1039/c4ra09077b), 2014-01-01
Supplement: c4ra09077b1.pdf [file c4ra09077b1.pdf]

## Supporting Information

Low-temperature facile solution-processed gate dielectric and active channel for oxide thin film transistors

Han Wang<sup>1</sup>, Tiejun Sun<sup>2</sup>, Wangying Xu<sup>1</sup>, Fangyan Xie<sup>3</sup>, Lei Ye<sup>1</sup>, Yubin Xiao<sup>1</sup>, Yu Wang<sup>2</sup>, Jian Chen<sup>3</sup>, Jianbin Xu<sup>1\*</sup>

<sup>1</sup>Department of Electronic Engineering and Materials Science and Technology Research Center, The Chinese University of Hong Kong, Shatin, N.T., Hong Kong SAR, P. R. China

<sup>2</sup>Department of Applied Physics and Material Research Center, The Hong Kong Polytechnic University, Kowloon, Hong Kong SAR, P. R. China

<sup>3</sup>Instrumental Analysis & Research Center, Sun Yat-Sen (Zhongshan) University, Guangzhou, P. R. China

[jbxu@ee.cuhk.edu.hk](mailto:jbxu@ee.cuhk.edu.hk)

The performances of TFTs transfer were demonstrated in figure S1.

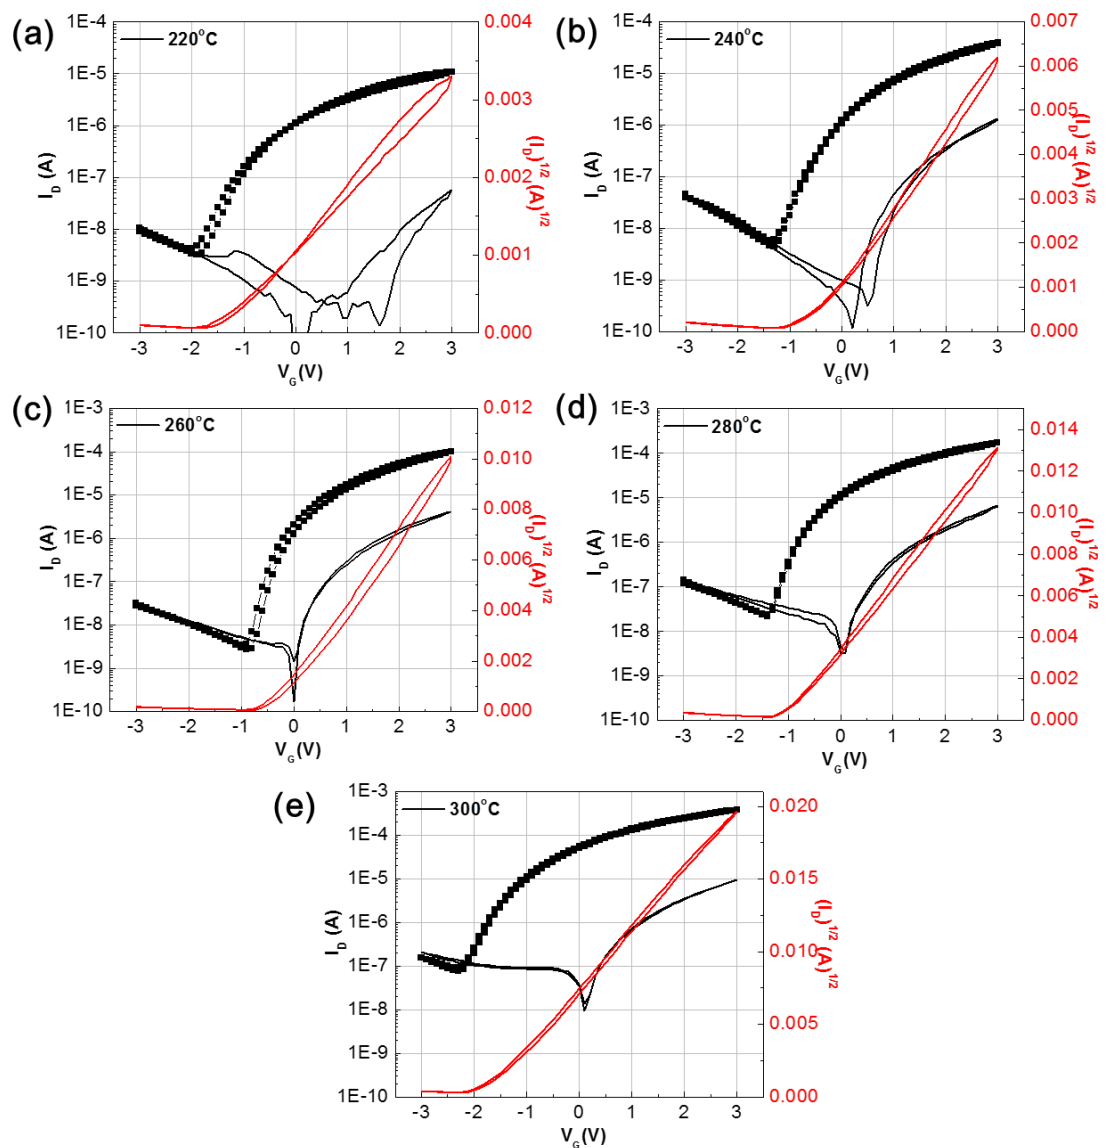

**Figure S1** Transfer performances of the samples. The annealing temperatures of them are (a) 220 °C, (b) 240 °C, (c) 260 °C, (d) 280 °C and (e) 300 °C.
